## Correction: New localization and function of calpain-2 in nucleoli of colorectal cancer cells in ribosomal biogenesis: effect of KRAS status

**Marcelino Telechea-Fernández<sup>1</sup>, Lucia Rodríguez-Fernández<sup>2</sup>, Concha García<sup>2</sup>, Rosa Zaragoza<sup>2,3</sup>, Juan R. Viña<sup>2</sup>, Andrés Cervantes<sup>1</sup> and Elena R. García-Trevijano<sup>2</sup>**

<sup>1</sup> CIBERONC, Department of Medical Oncology, INCLIVA Biomedical Research Institute/University of Valencia, Valencia, Spain

<sup>2</sup> Department of Biochemistry and Molecular Biology, INCLIVA Biomedical Research Institute/University of Valencia, Valencia, Spain

<sup>3</sup> Department of Anatomy and Human Embriology, INCLIVA Biomedical Research Institute/University of Valencia, Valencia, Spain

**Published:** April 06, 2018

Copyright: Telechea-Fernández et al. This is an open-access article distributed under the terms of the Creative Commons Attribution License 3.0 (CC BY 3.0), which permits unrestricted use, distribution, and reproduction in any medium, provided the original author and source are credited.

**This article has been corrected:** The correct author name is given below:

**Juan R. Viña**

Original article: Oncotarget. 2018; 9:9100-9113. <https://doi.org/10.18632/oncotarget.23888>
